# Supplementary material for: Endobronchial Mucosa Invasion Predicts Survival in Patients with Small Cell Lung Cancer
Source: PLOS journal article supplement (doi:10.1371/journal.pone.0047613), 2012-10-04
Supplement: S1 (10.1371/journal.pone.0047613.s001) [file journal.pone.0047613.s001]

**Chang Gung Medical Foundation**  
199, TUNG HWA NORTH ROAD,  
TAIPEI, TAIWAN, 10507  
REPUBLIC OF CHINA  
TEL: (03) 3196200  
Fax: (03) 3196102

2012-7-11

Protocol Title: The Clinical Value of Bronchoscopy in Predicting Survivals in Patients  
with Small Cell Lung Cancer

CGMF IRB No.: 99-2011B

Principal Investigator: Chun-Yu Lo

Co-Investigator: Pai-Chien Chou

Protocol Version: 2010.7.16

, was approved by the Institutional Review Board (the "IRB" ) of Chang Gung Medical  
Foundation on 2010-9-17. The IRB is organized and operates according to Good Clinical  
Practice and the applicable laws and regulations.

Sincerely Yours,



Tsang-Tang Hsieh, M.D.

Chairman

Institutional Review Board

Chang Gung Medical Foundation
